# Supplementary material
Source: PubMed Central journal article supplement (PMC3024002)
Supplement: es102473z_si_001.pdf [file es102473z_si_001.pdf]

## **Supplementary Information:**

### **Antibiotic resistance gene abundances associated with waste discharges into the Almendares River near Havana, Cuba**

David W. Graham<sup>1\*</sup>, Susana Olivares-Rieumont<sup>2</sup>, Charles W. Knapp<sup>1,3</sup>, Lazaro Lima<sup>2</sup>,  
David Werner<sup>1</sup> & Emma Bowen<sup>1</sup>

<sup>1</sup> School of Civil Engineering & Geosciences, Newcastle University, Newcastle upon Tyne,  
United Kingdom NE17RU

<sup>2</sup> Laboratorio de Análisis Ambiental, Instituto Superior de Tecnologías y Ciencias  
Aplicadas, Ave. Salvador Allende y Luaces, Plaza, Ciudad Habana, Cuba

<sup>3</sup> Current address: David Livingstone Centre for Sustainability, Department of Civil  
Engineering, University of Strathclyde, Glasgow, United Kingdom G1 1XN

Includes: Eight pages, 2 tables and 1 figure

## CONCENTRATIONS OF ORGANOCHLORIDE PESTICIDES IN SEDIMENT PORE WATERS

**MATERIALS AND METHODS.** Organochlorine pesticides (OCP) and metabolites analyzed in this work were:  $\alpha$ ,  $\beta$ ,  $\gamma$  and  $\delta$  hexachlorocyclohexane ( $\alpha$ ,  $\beta$ ,  $\gamma$  and  $\delta$  HCH), aldrin, dieldrin,  $\alpha$  endosulfan, endosulfan sulphate, endrin, endrin aldehyde, endrin ketone, heptachlor, heptachlor epoxide and methoxychlor, p,p' dichlorodiphenyltrichloroethane (DDT), p,p' dichlorodiphenyldichloroethane (DDD), and p,p' dichlorodiphenyldichloroethylene (DDE), which were obtained in an EPA TCL mix (Sigma Aldrich, Dorset, UK) at individual concentrations of  $2000 \mu\text{g mL}^{-1}$  in 50% hexane in toluene. Sediment porewater concentration of these OCP was derived with the help of passive samplers. 26  $\mu\text{m}$  thick PE sheets cut from plastic bags (VWR International, Leicestershire, UK) were soaked in hexane, methanol and deionised water, in series, each for 24 hr, then dried and cut into  $0.15 \pm 0.01$  g pieces. These PE passive samplers were equilibrated with 100 g of sediment in continuously agitated capped amber glass vials for 14 days.

After this exposure/equilibration PE passive samplers were removed from batches, rinsed until visibly clean, dried with kimwipes and extracted in 20 mL of 20% acetone in hexane for two 24 hr periods. Solvents from each sample extraction were combined and concentrated to 1 mL under a gentle stream of nitrogen. Samples were cleaned up using a modification of USEPA method 3620C. A glass column was packed with 3 g of activated Florisil, topped with 1 cm of anhydrous sodium sulphate and precleaned with 30 mL of 20% acetone in hexane. The 1 mL extract was then transferred to the top of the column and eluted with a further 30 mL of 20% acetone in hexane, which was collected and solvent switched to pure hexane before gas chromatography analysis. An internal standard of 2,2'3,3'4,4'5,5'6,6' decachlorobiphenyl (PCB 209) was added to all samples prior to analysis. OCP quantification was carried out on an Agilent 7890A gas chromatograph with an electron capture detector. Separation was performed on a fused silica capillary column (30 m x 0.25 mm i.d) coated with a 0.25  $\mu\text{m}$  dimethyl polysiloxane (HP-5) phase (Agilent Ltd, Wokingham, Berkshire, UK). Instrumental quantification was calibrated using dilutions of the EPA TCL mix for a five point calibration. Retention times of the OCP were verified by gas chromatography mass spectrometry on a Hewlett-Packard 6890 gas chromatograph and also with a  $0.017 \mu\text{g mL}^{-1}$  lindane/aldrin standard (Agilent Technologies, Palo Alto, USA). OCP concentrations in PE passive samplers were

translated into corresponding sediment porewater concentrations using PE-water partitioning coefficients  $K_{PE}$  published by Hale et al. (1).

## RESULTS AND DISCUSSION:

All OCP compound were at most present at very low concentrations in the range of up to a few ng/L. Only DDTs could be reliably identified based on the presence of three major peaks in the ECD chromatographic trace corresponding to the retention times of p,p' DDT and its major metabolites p,p' DDD and p,p' DDE. Results are summarized in Table S1.

**Table S1.** DDTs concentration for the different sampling stations (n.d. = not detectable). All other tested pesticides were below detection limits.

| Sample  | p,p' DDT<br>(ng/L)     | p,p' DDD<br>(ng/L) | p,p' DDE<br>(ng/L) |
|---------|------------------------|--------------------|--------------------|
| Blank   | n.d                    | n.d                | n.d                |
| Sta. 3A | 0.12                   | 0.36               | 0.08               |
| Sta. 4  | 0.02                   | 2.21               | 0.44               |
| Sta. 5  | Multiple peaks (PCBs?) |                    |                    |
| Sta. 5A | n.d                    | 0.26               | 0.06               |
| Sta. 6  | n.d                    | n.d                | 0.04               |
| Sta. 7  | n.d                    | n.d                | 0.04               |
| Sta. 8  | n.d                    | 0.11               | 0.06               |
| Sta. 9  | n.d                    | n.d                | n.d                |

**Table S2.** Primer and probe sequences used in the study, and PCR reaction conditions.

| Target           | Primer/probe<br>(concentration)                             | Sequence (5'-3') <sup>a</sup>                                                                           | Annealing<br>conditions | Elongation<br>conditions | Ref.       |
|------------------|-------------------------------------------------------------|---------------------------------------------------------------------------------------------------------|-------------------------|--------------------------|------------|
| Total eubacteria | BAC338-F (500 nM)<br>BAC516-F (300 nM)<br>BAC805-R (500 nM) | ACTCCTACGGGAGGCAG<br>Hex-TGCCAGCAGCCGCGGTAATAC-TAMRA<br>GACTACCAGGGTATCTAATCC                           | 60 °C / 30s             |                          | (2)        |
| <i>Tet(L)</i>    | TetL-F (900 nM)<br>TetL-Taq (300 nM)<br>TetL-R (900 nM)     | GGTTTTGAACGTCTCATTACCTGAT<br>FAM-CCACCTGCGAGTACAACTGGGTGAAC-TAMRA<br>CCAATGGAAAAGGTTAACATAAAGG          | 60 °C / 30s             |                          | (3)        |
| <i>Tet(M)</i>    | TetM-F (900 nM)<br>TetM-Taq (300 nM)<br>TetM-R (900 nM)     | GGTTTCTCTTGGATACTTAAATCAATCR<br>FAM-ATGCAGTTATGGARGGGATACGCTATGGY-<br>TAMRA<br>CCAACCATAYAATCCTTGTTTCRC | 60 °C / 30s             |                          | (3)        |
| <i>Tet(O)</i>    | TetO-F (900 nM)<br>TetO-Taq (300 nM)<br>TetO-R (900 nM)     | AAGAAAACAGGAGATTCCAAAACG<br>FAM-ACGTTATTTCCCGTTTATCACGG-TAMRA<br>CGAGTCCCCAGATTGTTTTTAGC                | 60 °C / 30s             |                          | (4)        |
| <i>Tet(Q)</i>    | TetQ-F (900 nM)<br>TetQ-Taq (300 nM)<br>TetQ-R (900 nM)     | AGGTGCTGAACCTTGTTTGATTC<br>FAM-TCGCATCAGCATCCCGCTC-TAMRA<br>GGCCGGACGGAGGATTT                           | 60 °C / 30s             |                          | (4)        |
| <i>Tet(W)</i>    | TetW-F (900 nM)<br>TetW-Taq (300 nM)<br>TetW-R (900 nM)     | GCAGAGCGTGGTTCAGTCT<br>TTCGGGATAAGCTCTCCGCCGA<br>GACACCGTCTGCTTGATGATAAT                                | 60 °C / 30s             |                          | (4)        |
| <i>Erm(B)</i>    | ErmB-F (500 nM)<br>ErmB-R (500 nM)                          | AAAACCTTACCCGCCATACCA<br>TTTGGCGTGTTTCATTGCTT                                                           | 60 °C / 30s             |                          | (5)        |
| <i>Erm(C)</i>    | ErmC-F (500 nM)<br>ErmC-R (500 nM)                          | GAAATCGGCTCAGGAAAAGG<br>TAGCAAACCCGTATTCCACG                                                            | 60 °C / 30s             |                          | (5)        |
| <i>Erm(E)</i>    | ErmE-F (500 nM)<br>ErmE-R (500 nM)                          | TGTTCGAGTGGGAGTTCGT<br>GGTACTTGCGCAGAAGCGA                                                              | 60 °C / 30s             |                          | (5)<br>(6) |
| <i>Erm(F)</i>    | ErmF-F (500 nM)                                             | TCGTTTTACGGGTCAGCACTT                                                                                   | 60 °C / 30s             |                          | (6)        |

| Target                      | Primer/probe<br>(concentration)               | Sequence (5'-3') <sup>a</sup>        | Annealing<br>conditions | Elongation<br>conditions | Ref. |
|-----------------------------|-----------------------------------------------|--------------------------------------|-------------------------|--------------------------|------|
| <i>bla</i> <sub>TEM</sub>   | ErmF-R (500 nM)                               | CAACCAAAGCTGTGTCGTTT                 |                         |                          | (5)  |
|                             | BlaTEM-F (400 nM)                             | TCGGGGAAATGTGCG                      | 50 °C / 60s             | 72 °C / 60s              | (7)  |
| <i>bla</i> <sub>SHV-1</sub> | BlaTEM-R (400 nM)                             | GGAATAAGGGCGACA                      |                         |                          |      |
|                             | blaSHV-F (400 nM)                             | TGATTTATCTGCGGGATACG                 | 55 °C / 60s             | 76 °C / 30s              | (8)  |
| <i>bla</i> <sub>CTX-M</sub> | BlaSHV-R (400 nM)                             | TTAGCGTTGCCAGTGCTCG                  |                         |                          | (9)  |
|                             | CTX-M-F (200 nM)                              | ATGTGCAGYACCAGTAARGTKATGGC           | 58 °C / 60s             | 72 °C / 30s              | (10) |
|                             | CTX-M-1-<br>group probe<br>(100 nM)           | HEX-CCCGACAGCTGGGAGACGAAACGT-TAMRA   |                         |                          |      |
|                             | CTX-M-<br>probe<br>(100 nM)                   | FAM-CGACAATACNGCCATGAAMGB-TAMRA      |                         |                          |      |
| <i>bla</i> <sub>OXA-1</sub> | CTX-M-R (200 nM)                              | ATCACKCGGRTCGCCNGGRAT                |                         |                          |      |
|                             | OXA1B14<br>(as forward<br>primer)<br>(400 nM) | CACTTACAGGAAACTTGGGGTTCG             | 55 °C / 60s             | 72 °C / 30s              | (11) |
|                             | OXA-probe<br>(200 nM)                         | HEX-ATCAAGCATAAAAGCCAAGAAAATGC-TAMRA |                         |                          | (5)  |
|                             | blaOXA1-R<br>(400 nM)                         | AGTGTGTTTAGAATGGTGATC                |                         |                          | (12) |

<sup>a</sup> Sequence modification added: 5'-FAM (6-carboxyfluorescein; fluorophore); 5'-HEX (hexachlorofluorescein; fluorophore); 3'-TAMRA (carboxytetramethylrhodamine; quencher).

**Figure S1.** Total dissolved solids (lines) and dissolved oxygen levels (bars) in the Alameda River water column during the dry season sampling program in 2007. Errors bars refer to concentration ranges based on n = 4.

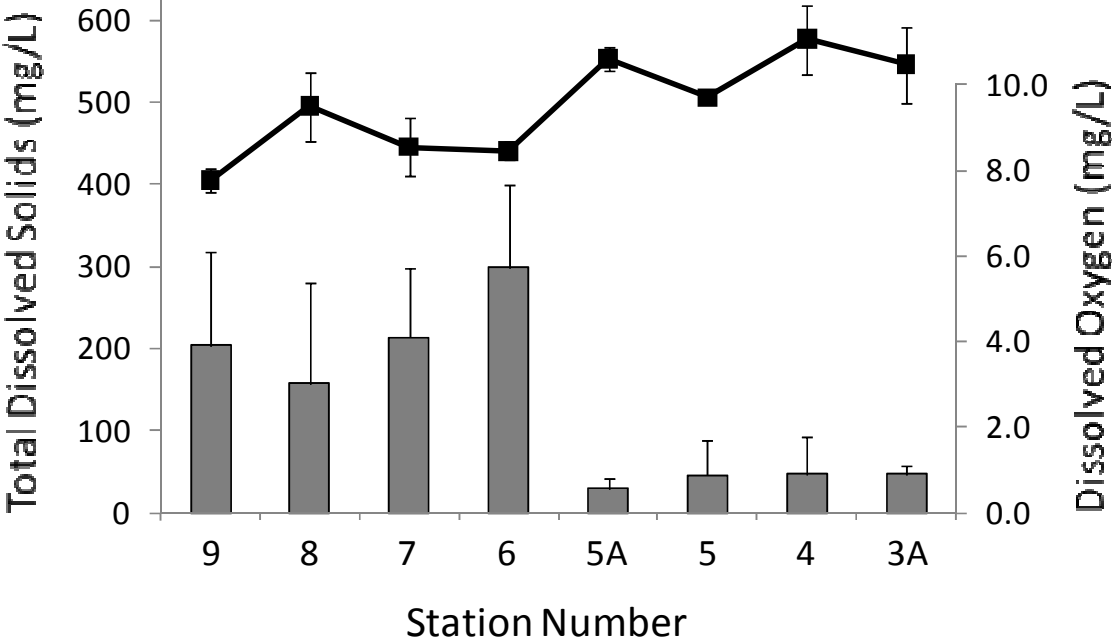

## REFERENCES:

- (1) Hale, S.E., J.E. Tomaszewski, R.G. Luthy, and D. Werner, Sorption of dichlorodiphenyltrichloroethane (DDT) and its metabolites by activated carbon in clean water and sediment slurries. *Water Research*, 2009, *43*, 4336-4346.
- (2) Yu, Y.; Lee, C.; Kim, J.; Hwang, S., Group-specific primer and probe sets to detect methanogenic communities using quantitative real-time polymerase chain reaction. *Biotechnol. Bioengineer.* **2005**, *89*, (6), 670-679.
- (3) Peak, N.; Knapp, C. W.; Yang, R. K.; Hanfelt, M. M.; Smith, M. S.; Aga, D. S.; Graham, D. W., Abundance of six tetracycline resistance genes in wastewater lagoons at cattle feedlots with different antibiotic use strategies. *Environ. Microbiol.* **2007**, *9*, (1), 143-151.
- (4) Smith, M. S.; Yang, R. K.; Knapp, C. W.; Niu, Y. F.; Peak, N.; Hanfelt, M. M.; Galland, J. C.; Graham, D. W., Quantification of tetracycline resistance genes in feedlot lagoons by real-time PCR. *Appl. Environ. Microbiol.* **2004**, *70*, (12), 7372-7377.
- (5) Knapp, C.W.; Dolfing, J.; Ehlert, P.; Graham, D.W. Evidence of increasing antibiotic resistance gene abundances in archived soils since 1940. 2010. *Environ. Sci. Technol.* **2010**, *44*, 580-587.
- (6) Patterson, A. J.; Colangeli, R.; Spigaglia, P.; Scott, K. P., Distribution of specific tetracycline and erythromycin resistance genes in environmental samples assessed by macroarray detection. *Environ. Microbiol.* **2007**, *9*, (3), 703-715.
- (7) De Gheldre, Y.; Avesani, V.; Berhin, C.; Delmee, M.; Glupczynski, Y., Evaluation of Oxoid combination discs for detection of extended-spectrum beta-lactamases. *J. Antimicrob. Chemother.* **2003**, *52*, (4), 591-597.
- (8) Haeggman, S.; Lofdahl, S.; Paauw, A.; Verhoef, J.; Brisse, S., Diversity and evolution of the class a chromosomal beta-lactamase gene in *Klebsiella pneumoniae*. *Antimicrob. Ag. Chemother.* **2004**, *48*, (7), 2400-2408.
- (9) Hanson, N. D.; Thomson, K. S.; Moland, E. S.; Sanders, C. C.; Berthold, G.; Penn, R. G., Molecular characterization of a multiply resistant *Klebsiella pneumoniae* encoding ESBLs and a plasmid-mediated AmpC. *J. Antimicrob. Chemother.* **1999**, *44*, (3), 377-380.
- (10) Birkett, C. I.; Ludlam, H. A.; Woodford, N.; Brown, D. F. J.; Brown, N. M.; Roberts, M. T. M.; Milner, N.; Curran, M. D., Real-time TaqMan PCR for rapid

detection and typing of genes encoding CTX-M extended-spectrum beta-lactamases. *J. Med. Microbiol.* **2007**, *56*, (1), 52-55.

- (11) Moland, E. S.; Hanson, N. D.; Black, J. A.; Hossain, A.; Song, W. K.; Thomson, K. S., Prevalence of newer beta-lactamases in gram-negative clinical isolates collected in the United States from 2001 to 2002. *J. Clin. Microbiol.* **2006**, *44*, (9), 3318-3324.
- (12) Brinas, L.; Moreno, M. A.; Zarazaga, M.; Porrero, C.; Saenz, Y.; Garcia, M.; Dominguez, L.; Torres, C., Detection of CMY-2, CTX-M-14, and SHV-12 beta-lactamases in *Escherichia coli* fecal-sample isolates from healthy chickens. *Antimicrob. Ag. Chemother.* **2003**, *47*, (6), 2056-2058.
